# Supplementary material for: A nonsymmetric Dy2 single-molecule magnet with two relaxation processes triggered by an external magnetic field: a theoretical and integrated EPR study of the role of magnetic-site dilution
Source: Royal Society of Chemistry journal article supplement (doi:10.1039/d1dt04089h), 2022-01-01
Supplement: d1dt04089h1.pdf [file d1dt04089h1.pdf]

## Supporting Information

# A Nonsymmetric Dy<sub>2</sub> Single-Molecule Magnet with two Relaxation Processes Triggered by External Magnetic Field: Theoretical and Integrated EPR study of the Role of Magnetic-Site Dilution

Nikolia Lalioti,<sup>†</sup> Vassilis Nastopoulos,<sup>†</sup> Nikos Panagiotou,<sup>‡</sup> Anastasios Tasiopoulos,<sup>‡</sup> Nikolaos

Ioannidis,<sup>||\*</sup> Joris van Slageren,<sup>∞\*</sup> Peng Zang,<sup>⊗,∞</sup> Gopalan Rajaraman,<sup>##</sup> Abinash Swain,<sup>#</sup> and Vassilis Tangoulis<sup>†\*</sup>

<sup>†</sup> Department of Chemistry, Laboratory of Inorganic Chemistry, University of Patras, 26504 Patras, Greece

<sup>‡</sup> Department of Chemistry, University of Cyprus, 1678 Nicosia, Cyprus

<sup>||</sup> Institute of Nanoscience and Nanotechnology, NCSR “Demokritos”, 153 10 Aghia Paraskevi Attikis, Greece

<sup>⊗</sup> School of Chemistry & Chemical Engineering, Shaanxi Normal University Xi'an, 710199, China

<sup>∞</sup> Institut für Physikalische Chemie, Universität Stuttgart, Pfaffenwaldring 55, D-70569 Stuttgart, Germany

<sup>#</sup> Department of Chemistry, Indian Institute of Technology Bombay, Powai, Mumbai - 400 076, India

## Tables

|                                                                                                                                                                                                                                           |           |
|-------------------------------------------------------------------------------------------------------------------------------------------------------------------------------------------------------------------------------------------|-----------|
| <b>Table S1.</b> Crystal data and structure refinement for 1·MeOH at 106.8(2) and Dy@Y2 at 107.7(6) K.....                                                                                                                                | <b>4</b>  |
| Table S2. Coordination geometry analysis for the 8-coordinated metal atoms Dy1 and Dy2 of 1·MeOH by the SHAPE v2.1 software. ....                                                                                                         | <b>5</b>  |
| Table S3. Selected Bond lengths [Å] for 1·MeOH at 106.8(2) K with estimated standard deviations in parentheses.....                                                                                                                       | <b>6</b>  |
| Table S4. Bond angles [°] for 1·MeOH at 106.8(2) K with estimated standard deviations in parentheses.....                                                                                                                                 | <b>7</b>  |
| Table S5. Geometry (Å, °) of the strong hydrogen-bonding motifs in compound 1·MeOH .....                                                                                                                                                  | <b>9</b>  |
| Table S6. Bond lengths [Å] for Y@Dy2 at 107.7(6) K with estimated standard deviations in parentheses.....                                                                                                                                 | <b>9</b>  |
| Table S7. Selected Bond angles [°] for Dy@Y2 at 107.7(6) K with estimated standard deviations in parentheses.....                                                                                                                         | <b>10</b> |
| Table S8. Parameters obtained by fitting the Cole-Cole plots (1500 dc field, Figure 4e) of 1·MeOH using the sum of two generalized Debye functions.....                                                                                   | <b>16</b> |
| Table S9. Parameters obtained by fitting the out-of-phase (Figure 5b) versus T ac magnetic susceptibility signals for Dy@Y2 in a 3.0 G ac field oscillating between 1488 and 10 Hz using the sum of two generalized Debye functions. .... | <b>17</b> |
| Table S10. Ab Initio CASSCF/RASSI-SO calculations of the energy barrier of the lowest 8 KD of both Dy centers in 1·MeOH along with the deviation in the angle of the excited state anisotropic axis with respect to the ground state..... | <b>18</b> |
| Table S11. Ab initio computed crystal field parameters for Dy-1 and Dy-2 centres of 1·MeOH .....                                                                                                                                          | <b>19</b> |

## Figures

|                                                                                                                                                                                                                                                                                                                                                                                                                                                                                                                 |           |
|-----------------------------------------------------------------------------------------------------------------------------------------------------------------------------------------------------------------------------------------------------------------------------------------------------------------------------------------------------------------------------------------------------------------------------------------------------------------------------------------------------------------|-----------|
| <b>Figure S 1.</b> The IR spectra ( KBr, $\text{cm}^{-1}$ ) of <b>1·MeOH</b> and <b>Dy@Y2</b> . .....                                                                                                                                                                                                                                                                                                                                                                                                           | <b>20</b> |
| <b>Figure S 2.</b> Experimental and theoretical X-ray powder patterns of <b>1·MeOH</b> and <b>Dy@Y2</b> .....                                                                                                                                                                                                                                                                                                                                                                                                   | <b>21</b> |
| <b>Figure S 3.</b> Partially labelled plot of the crystal structure of <b>Dy@Y2</b> . The polyhedral representations of the $\text{Y}^{\text{III}}$ atoms are also shown. Hydrogen atoms and the dopant $\text{Dy}^{\text{III}}$ ions have been omitted for the shake of clarity.....                                                                                                                                                                                                                           | <b>22</b> |
| <b>Figure S 4. (upper)</b> Dc magnetic susceptibility of of <b>1·MeOH</b> and <b>Dy@Y2</b> in the 300-2 K temperature range under an applied field of 0.1 T. <b>(lower)</b> Isothermal magnetization curves of <b>1·MeOH</b> and <b>Dy@Y2</b> at 2K and 5K. ....                                                                                                                                                                                                                                                | <b>23</b> |
| <b>Figure S 5.</b> <i>Field dependence of the out-of-phase ac susceptibility signals for 1·MeOH</i> .....                                                                                                                                                                                                                                                                                                                                                                                                       | <b>24</b> |
| <b>Figure S 6. (a)-(b)</b> The weak temperature dependent $\chi''$ signals were observed under zero dc field, indicating a small effective barrier. <b>(c)-(d)</b> No linear region is observed in Arrhenius fitting, while an exponential ( $T^n$ ) fitting gives n value close to 1, suggesting the direct relaxation process present here. <b>(e)</b> The fitting of Cole-Cole plots with a generalized Debye model gives $\alpha$ values between 0.12 and 0.34. All curves are refer to <b>1·MeOH</b> ..... | <b>25</b> |
| <b>Figure S 7.</b> Under zero field, no $\chi_M''$ peaks were observed for the sample <b>Dy@Y2</b> .....                                                                                                                                                                                                                                                                                                                                                                                                        | <b>26</b> |
| <b>Figure S 8.</b> LoProp charge on the surrounding O of both Dy-1 and Dy-2 centres of <b>1·MeOH</b> .26                                                                                                                                                                                                                                                                                                                                                                                                        |           |
| <b>Figure S 9.</b> Poly_aniso fitted magnetic susceptibility for sample <b>1·MeOH</b> (solid spheres). The magnetic susceptibility of <b>Dy@Y2</b> ( solid triangles) is also presented for comparison reasons .....                                                                                                                                                                                                                                                                                            | <b>27</b> |
| <b>Figure S 10.</b> Spin density plots for the high spin and broken symmetry states, obtained from the density function calculations using broken symmetry approach for <b>1·MeOH</b> .....                                                                                                                                                                                                                                                                                                                     | <b>28</b> |

**Table S1.** Crystal data and structure refinement for **1**•MeOH at 106.8(2) and **Dy@Y2** at 107.7(6) K.

|                                      |                                                                                                                                    |                                                                                                                                    |
|--------------------------------------|------------------------------------------------------------------------------------------------------------------------------------|------------------------------------------------------------------------------------------------------------------------------------|
| Empirical formula                    | C <sub>74</sub> H <sub>62</sub> Dy <sub>2</sub> O <sub>14</sub>                                                                    | C <sub>74</sub> H <sub>62</sub> Dy <sub>0.14</sub> O <sub>14</sub> Y <sub>1.86</sub>                                               |
| Formula weight                       | 1500.23                                                                                                                            | 1363.18                                                                                                                            |
| Temperature                          | 106.8(2) K                                                                                                                         | 107.7(6) K                                                                                                                         |
| Wavelength                           | 1.54184 Å                                                                                                                          | 1.54184 Å                                                                                                                          |
| Crystal system                       | Triclinic                                                                                                                          | Triclinic                                                                                                                          |
| Space group                          | P $\bar{1}$                                                                                                                        | P $\bar{1}$                                                                                                                        |
| Unit cell dimensions                 | a = 11.2128(4) Å<br>b = 16.0056(7) Å<br>c = 18.6715(9) Å<br>$\alpha$ = 78.035(4)°<br>$\beta$ = 75.762(4)°<br>$\gamma$ = 72.617(4)° | a = 11.1868(4) Å<br>b = 16.0404(6) Å<br>c = 18.6620(6) Å<br>$\alpha$ = 78.186(3)°<br>$\beta$ = 75.862(3)°<br>$\gamma$ = 72.605(3)° |
| Volume                               | 3067.0(2) Å <sup>3</sup>                                                                                                           | 3067.2(2) Å <sup>3</sup>                                                                                                           |
| Z                                    | 2                                                                                                                                  | 2                                                                                                                                  |
| Density (calculated)                 | 1.624 g/cm <sup>3</sup>                                                                                                            | 1.476 g/cm <sup>3</sup>                                                                                                            |
| Absorption coefficient               | 13.456 mm <sup>-1</sup>                                                                                                            | 3.813 mm <sup>-1</sup>                                                                                                             |
| F(000)                               | 1500                                                                                                                               | 1399                                                                                                                               |
| Crystal size                         | 0.09 x 0.06 x 0.05 mm                                                                                                              | 0.05x 0.03 x 0.03 mm                                                                                                               |
| $\theta$ range for data collection   | 3.54 to 73.17°                                                                                                                     | 3.54 to 73.55°                                                                                                                     |
| Index ranges                         | -8<=h<=13, -17<=k<=19, -22<=l<=22                                                                                                  | -13<=h<=11, -19<=k<=19, -22<=l<=20                                                                                                 |
| Reflections collected                | 20441                                                                                                                              | 20366                                                                                                                              |
| Independent reflections              | 11046 [R <sub>int</sub> = 0.0322]                                                                                                  | 11053 [R <sub>int</sub> = 0.0391]                                                                                                  |
| $\theta$ /completeness               | 67.5°/99.9%                                                                                                                        | 67.5°/99.9%                                                                                                                        |
| Refinement method                    | Full-matrix least-squares on F <sup>2</sup>                                                                                        | Full-matrix least-squares on F <sup>2</sup>                                                                                        |
| Data / restraints / parameters       | 11046 / 44 / 825                                                                                                                   | 11053 / 50 / 827                                                                                                                   |
| Goodness-of-fit on F <sup>2</sup>    | 1.037                                                                                                                              | 1.019                                                                                                                              |
| Final R indices [I > 2 $\sigma$ (I)] | R <sub>1</sub> = 0.0382, wR <sub>2</sub> = 0.0969                                                                                  | R <sub>1</sub> = 0.044, wR <sub>2</sub> = 0.113                                                                                    |
| R indices [all data]                 | R <sub>1</sub> = 0.0454, wR <sub>2</sub> = 0.1022                                                                                  | R <sub>1</sub> = 0.056, wR <sub>2</sub> = 0.123                                                                                    |
| Largest diff. peak and hole          | 1.892 and -0.670 e·Å <sup>-3</sup>                                                                                                 | 1.673 and -0.703 e·Å <sup>-3</sup>                                                                                                 |

$R_1 = \sum ||F_o| - |F_c|| / \sum |F_o|$ ,  $wR_2 = \{\sum [w(F_o^2 - F_c^2)^2] / \sum [w(F_o^2)^2]\}^{1/2}$  and  $w = 1 / [\sigma^2(F_o^2) + (aP)^2 + bP]$  where  $P = (F_o^2 + 2F_c^2) / 3$  and a and b are the two weighting parameters suggested by the SHELXL refinement software.

Table S2. Coordination geometry analysis for the 8-coordinated metal atoms Dy1 and Dy2 of 1·MeOH by the SHAPE v2.1 software.

|        | CShM value   |              | Symmetry                   | Polyhedron                                 |
|--------|--------------|--------------|----------------------------|--------------------------------------------|
|        | Dy1          | Dy2          |                            |                                            |
| 1·MeOH |              |              |                            |                                            |
|        | 28.802       | 28.284       | $D_{8h}$                   | Octagon                                    |
|        | 23.095       | 22.121       | $C_{7v}$                   | Heptagonal pyramid                         |
|        | 15.634       | 16.787       | $D_{6h}$                   | Hexagonal bipyramid                        |
|        | 9.179        | 9.596        | $O_h$                      | Cube                                       |
|        | <b>0.607</b> | <b>0.494</b> | <b><math>D_{4d}</math></b> | <b>Square antiprism</b>                    |
|        | 1.959        | 1.781        | $D_{2d}$                   | Triangular dodecahedron                    |
|        | 14.268       | 15.472       | $D_{2d}$                   | Johnson gyrobifastigium J26                |
|        | 27.337       | 27.330       | $D_{3h}$                   | Johnson elongated triangular bipyramid J14 |
|        | 2.502        | 2.535        | $C_{2v}$                   | Biaugmented trigonal prism J50             |
|        | 1.894        | 1.788        | $C_{2v}$                   | Biaugmented trigonal prism                 |
|        | 4.921        | 4.484        | $D_{2d}$                   | Snub diphenooid J84                        |
|        | 9.808        | 10.354       | $T_d$                      | Triakis tetrahedron                        |
|        | 22.661       | 22.574       | $D_{3h}$                   | Elongated trigonal bipyramid               |

**Table S3.** Selected Bond lengths [Å] for **1**·MeOH at 106.8(2) K with estimated standard deviations in parentheses.

| Distance | Value     |
|----------|-----------|
| O1-DY2   | 2.342(3)  |
| O1-DY1   | 2.360(3)  |
| O1M-DY2  | 2.383(3)  |
| O2-DY1   | 2.428(3)  |
| O2M-H2M  | 0.852(10) |
| O3-DY1   | 2.302(3)  |
| O4-DY1   | 2.362(3)  |
| O5-DY1   | 2.255(3)  |
| O6-DY1   | 2.336(3)  |
| O7-DY1   | 2.365(3)  |
| O7-DY2   | 2.376(3)  |
| O8-DY2   | 2.402(3)  |
| O9-DY2   | 2.360(3)  |
| O10-DY2  | 2.337(3)  |
| O10-DY1  | 2.403(3)  |
| O11-DY2  | 2.266(3)  |
| O12-DY2  | 2.289(3)  |
| DY1-DY2  | 3.5669(3) |

**Table S4.** Bond angles [°] for 1·MeOH at 106.8(2) K with estimated standard deviations in parentheses.

| Angle       | Value      |
|-------------|------------|
| DY2-O1-DY1  | 98.69(10)  |
| DY1-O7-DY2  | 97.57(10)  |
| DY2-O10-DY1 | 97.63(10)  |
| O5-DY1-O3   | 82.52(11)  |
| O5-DY1-O6   | 70.62(10)  |
| O3-DY1-O6   | 141.43(11) |
| O5-DY1-O1   | 142.54(10) |
| O3-DY1-O1   | 78.54(10)  |
| O6-DY1-O1   | 138.66(10) |
| O5-DY1-O4   | 81.89(12)  |
| O3-DY1-O4   | 69.98(12)  |
| O6-DY1-O4   | 79.03(12)  |
| O1-DY1-O4   | 120.29(12) |
| O5-DY1-O7   | 149.07(10) |
| O3-DY1-O7   | 108.92(11) |
| O6-DY1-O7   | 84.18(10)  |
| O1-DY1-O7   | 68.30(10)  |
| O4-DY1-O7   | 75.79(11)  |
| O5-DY1-O10  | 117.15(11) |
| O3-DY1-O10  | 144.78(10) |
| O6-DY1-O10  | 73.65(10)  |
| O1-DY1-O10  | 68.30(10)  |
| O4-DY1-O10  | 137.76(11) |
| O7-DY1-O10  | 69.99(10)  |
| O5-DY1-O2   | 76.84(10)  |
| O3-DY1-O2   | 83.22(10)  |
| O6-DY1-O2   | 115.44(10) |
| O1-DY1-O2   | 69.10(10)  |
| O4-DY1-O2   | 147.66(11) |
| O7-DY1-O2   | 131.87(10) |
| O10-DY1-O2  | 74.32(10)  |
| O5-DY1-DY2  | 157.48(8)  |
| O3-DY1-DY2  | 115.11(8)  |
| O6-DY1-DY2  | 98.82(7)   |
| O1-DY1-DY2  | 40.47(7)   |
| O4-DY1-DY2  | 116.42(9)  |

|             |            |
|-------------|------------|
| O7-DY1-DY2  | 41.33(7)   |
| O10-DY1-DY2 | 40.49(7)   |
| O2-DY1-DY2  | 90.87(7)   |
| O11-DY2-O12 | 70.91(11)  |
| O11-DY2-O10 | 77.11(11)  |
| O12-DY2-O10 | 121.79(11) |
| O11-DY2-O1  | 110.84(11) |
| O12-DY2-O1  | 78.04(10)  |
| O10-DY2-O1  | 69.70(10)  |
| O11-DY2-O9  | 83.46(11)  |
| O12-DY2-O9  | 146.14(11) |
| O10-DY2-O9  | 70.91(11)  |
| O1-DY2-O9   | 133.23(10) |
| O11-DY2-O7  | 146.07(11) |
| O12-DY2-O7  | 136.91(11) |
| O10-DY2-O7  | 70.93(10)  |
| O1-DY2-O7   | 68.40(10)  |
| O9-DY2-O7   | 75.70(11)  |
| O11-DY2-O1M | 80.78(12)  |
| O12-DY2-O1M | 77.99(11)  |
| O10-DY2-O1M | 142.09(11) |
| O1-DY2-O1M  | 147.88(11) |
| O9-DY2-O1M  | 76.33(11)  |
| O7-DY2-O1M  | 118.73(10) |
| O11-DY2-O8  | 144.88(11) |
| O12-DY2-O8  | 80.20(11)  |
| O10-DY2-O8  | 136.76(10) |
| O1-DY2-O8   | 81.21(10)  |
| O9-DY2-O8   | 112.88(11) |
| O7-DY2-O8   | 68.91(10)  |
| O1M-DY2-O8  | 73.89(12)  |
| O11-DY2-DY1 | 115.24(8)  |
| O12-DY2-DY1 | 118.10(8)  |
| O10-DY2-DY1 | 41.88(7)   |
| O1-DY2-DY1  | 40.84(7)   |
| O9-DY2-DY1  | 92.45(8)   |
| O7-DY2-DY1  | 41.10(7)   |
| O1M-DY2-DY1 | 159.64(8)  |



**Table S5.** Geometry (Å, °) of the strong hydrogen-bonding motifs in compound **1**•MeOH

| $D-H\cdots A$                     | $D-H$   | $H\cdots A$ | $D\cdots A$ | $D-H\cdots A$ |
|-----------------------------------|---------|-------------|-------------|---------------|
| O1M-H1M $\cdots$ O2M <sup>i</sup> | 0.82(6) | 1.88(6)     | 2.681(5)    | 163(5)        |
| O2M-H2M $\cdots$ O3               | 0.85(5) | 1.88(5)     | 2.727(5)    | 176(6)        |
|                                   |         |             |             |               |

Symmetry codes: (i) 1+x, y, z.

**Table S6.** Bond lengths [Å] for **Y@Dy2** at 107.7(6) K with estimated standard deviations in parentheses.

| Distance | Value     |
|----------|-----------|
| Y1-O5    | 2.254(3)  |
| Y1-O3    | 2.286(3)  |
| Y1-O6    | 2.313(3)  |
| Y1-O10   | 2.390(3)  |
| Y1-O1    | 2.354(3)  |
| Y1-O4    | 2.343(3)  |
| Y1-O7    | 2.331(3)  |
| Y1-O2    | 2.427(3)  |
| Y1-DY2   | 3.490(7)  |
| Y1-Y2    | 3.549(1)  |
| DY1-O5   | 2.199(9)  |
| DY1-O6   | 2.401(11) |
| DY1-O7   | 2.461(7)  |
| DY1-O2   | 2.266(8)  |
| DY1-O3   | 2.237(14) |
| DY1-O10  | 2.388(12) |
| DY1-O1   | 2.313(9)  |

|         |           |
|---------|-----------|
| DY1-O4  | 2.460(10) |
| DY1-DY2 | 3.526(10) |
| DY1-Y2  | 3.585(9)  |
| Y2-O11  | 2.248(3)  |
| Y2-O12  | 2.284(3)  |
| Y2-O7   | 2.383(3)  |
| Y2-O1   | 2.330(2)  |
| Y2-O8   | 2.414(3)  |
| Y2-O1M  | 2.369(3)  |
| Y2-O10  | 2.315(3)  |
| Y2-O9   | 2.329(3)  |
| DY2-O1  | 2.163(10) |
| DY2-O12 | 2.202(9)  |
| DY2-O10 | 2.450(9)  |
| DY2-O9  | 2.536(10) |
| DY2-O7  | 2.291(9)  |
| DY2-O11 | 2.466(10) |
| DY2-O8  | 2.180(10) |
| DY2-O1M | 2.434(9)  |

---

Table S7. Selected Bond angles [°] for **Dy@Y2** at 107.7(6) K with estimated standard deviations in parentheses.

| Distance  | Value      |
|-----------|------------|
| O5-Y1-O3  | 81.90(10)  |
| O5-Y1-O6  | 70.99(10)  |
| O3-Y1-O6  | 141.47(11) |
| O5-Y1-O10 | 116.84(11) |
| O3-Y1-O10 | 144.31(10) |
| O6-Y1-O10 | 73.93(10)  |
| O5-Y1-O1  | 141.66(10) |
| O3-Y1-O1  | 78.64(10)  |
| O6-Y1-O1  | 138.75(10) |
| O10-Y1-O1 | 68.06(9)   |
| O5-Y1-O4  | 81.81(11)  |
| O3-Y1-O4  | 70.29(11)  |
| O6-Y1-O4  | 78.99(11)  |
| O10-Y1-O4 | 138.61(10) |
| O1-Y1-O4  | 121.01(11) |

|            |            |
|------------|------------|
| O5-Y1-O7   | 149.97(10) |
| O3-Y1-O7   | 109.25(11) |
| O6-Y1-O7   | 84.63(9)   |
| O10-Y1-O7  | 70.48(9)   |
| O1-Y1-O7   | 68.30(9)   |
| O4-Y1-O7   | 76.40(10)  |
| O5-Y1-O2   | 76.03(9)   |
| O3-Y1-O2   | 82.83(9)   |
| O6-Y1-O2   | 115.07(11) |
| O10-Y1-O2  | 73.78(9)   |
| O1-Y1-O2   | 69.02(9)   |
| O4-Y1-O2   | 147.25(10) |
| O7-Y1-O2   | 131.85(10) |
| O5-Y1-DY2  | 160.76(17) |
| O3-Y1-DY2  | 111.29(18) |
| O6-Y1-DY2  | 102.47(19) |
| O10-Y1-DY2 | 44.55(17)  |
| O1-Y1-DY2  | 37.46(17)  |
| O4-Y1-DY2  | 115.32(19) |
| O2-Y1-DY2  | 91.35(18)  |
| O7-Y1-DY2  | 40.53(19)  |
| O2-Y1-Y2   | 90.51(7)   |
| O5-Y1-Y2   | 156.85(10) |
| O3-Y1-Y2   | 115.50(8)  |
| O6-Y1-Y2   | 98.92(7)   |
| O10-Y1-Y2  | 40.26(6)   |
| O1-Y1-Y2   | 40.48(6)   |
| O4-Y1-Y2   | 117.50(8)  |
| O7-Y1-Y2   | 41.71(7)   |
| O5-DY1-O6  | 70.2(3)    |
| O5-DY1-O7  | 143.6(4)   |
| O6-DY1-O7  | 80.0(3)    |
| O5-DY1-O2  | 80.5(3)    |
| O6-DY1-O2  | 117.9(5)   |
| O7-DY1-O2  | 133.5(4)   |
| O5-DY1-O3  | 84.2(4)    |
| O6-DY1-O3  | 138.7(4)   |
| O7-DY1-O3  | 106.4(5)   |

|             |            |
|-------------|------------|
| O2-DY1-O3   | 87.7(3)    |
| O5-DY1-O10  | 119.1(6)   |
| O6-DY1-O10  | 72.4(4)    |
| O7-DY1-O10  | 68.3(3)    |
| O2-DY1-O10  | 76.8(3)    |
| O3-DY1-O10  | 148.5(4)   |
| O5-DY1-O1   | 149.4(4)   |
| O6-DY1-O1   | 135.8(5)   |
| O7-DY1-O1   | 66.8(2)    |
| O2-DY1-O1   | 72.5(2)    |
| O3-DY1-O1   | 80.5(4)    |
| O10-DY1-O1  | 68.8(3)    |
| O5-DY1-O4   | 80.3(3)    |
| O6-DY1-O4   | 75.0(2)    |
| O7-DY1-O4   | 71.9(2)    |
| O2-DY1-O4   | 151.0(5)   |
| O3-DY1-O4   | 68.9(4)    |
| O10-DY1-O4  | 131.9(3)   |
| O1-DY1-O4   | 117.8(5)   |
| O5-DY1-DY2  | 163.1(6)   |
| O6-DY1-DY2  | 99.6(3)    |
| O7-DY1-DY2  | 40.3(2)    |
| O2-DY1-DY2  | 93.2(4)    |
| O3-DY1-DY2  | 111.4(4)   |
| O10-DY1-DY2 | 43.9(2)    |
| O1-DY1-DY2  | 36.5(3)    |
| O4-DY1-DY2  | 110.8(4)   |
| O5-DY1-Y2   | 158.7(6)   |
| O6-DY1-Y2   | 96.2(3)    |
| O7-DY1-Y2   | 41.43(15)  |
| O2-DY1-Y2   | 92.3(3)    |
| O3-DY1-Y2   | 115.7(4)   |
| O10-DY1-Y2  | 39.61(14)  |
| O1-DY1-Y2   | 39.62(15)  |
| O4-DY1-Y2   | 112.9(3)   |
| O11-Y2-O12  | 71.22(10)  |
| O11-Y2-O7   | 146.58(10) |
| O12-Y2-O7   | 135.90(10) |

|            |            |
|------------|------------|
| O11-Y2-O1  | 110.93(10) |
| O12-Y2-O1  | 77.82(9)   |
| O7-Y2-O1   | 67.84(9)   |
| O11-Y2-O8  | 144.61(10) |
| O12-Y2-O8  | 79.40(10)  |
| O7-Y2-O8   | 68.73(9)   |
| O1-Y2-O8   | 80.68(9)   |
| O11-Y2-O1M | 80.97(10)  |
| O12-Y2-O1M | 77.71(10)  |
| O7-Y2-O1M  | 118.95(10) |
| O1-Y2-O1M  | 147.29(11) |
| O8-Y2-O1M  | 73.76(10)  |
| O11-Y2-O10 | 77.47(10)  |
| O12-Y2-O10 | 122.16(10) |
| O7-Y2-O10  | 70.87(9)   |
| O1-Y2-O10  | 69.73(9)   |
| O8-Y2-O10  | 136.52(9)  |
| O1M-Y2-O10 | 142.68(11) |
| O11-Y2-O9  | 84.43(11)  |
| O12-Y2-O9  | 146.71(10) |
| O7-Y2-O9   | 75.82(10)  |
| O1-Y2-O9   | 133.49(9)  |
| O8-Y2-O9   | 112.35(10) |
| O1M-Y2-O9  | 76.29(10)  |
| O10-Y2-O9  | 71.63(9)   |
| O11-Y2-Y1  | 115.59(8)  |
| O12-Y2-Y1  | 118.13(7)  |
| O7-Y2-Y1   | 40.61(6)   |
| O1-Y2-Y1   | 41.00(6)   |
| O8-Y2-Y1   | 95.31(7)   |
| O1M-Y2-Y1  | 159.39(8)  |
| O10-Y2-Y1  | 41.85(7)   |
| O9-Y2-Y1   | 92.52(7)   |
| O11-Y2-DY1 | 113.75(18) |
| O12-Y2-DY1 | 116.02(17) |
| O7-Y2-DY1  | 43.12(14)  |
| O1-Y2-DY1  | 39.29(19)  |
| O8-Y2-DY1  | 96.5(2)    |

|             |            |
|-------------|------------|
| O1M-Y2-DY1  | 161.97(14) |
| O10-Y2-DY1  | 41.1(2)    |
| O9-Y2-DY1   | 94.20(19)  |
| O1-DY2-O12  | 83.2(4)    |
| O1-DY2-O10  | 70.0(3)    |
| O12-DY2-O10 | 119.8(5)   |
| O1-DY2-O9   | 131.1(3)   |
| O12-DY2-O9  | 137.7(4)   |
| O10-DY2-O9  | 66.0(2)    |
| O1-DY2-O7   | 72.3(2)    |
| O12-DY2-O7  | 148.7(5)   |
| O10-DY2-O7  | 70.1(2)    |
| O9-DY2-O7   | 73.5(3)    |
| O1-DY2-O11  | 108.9(4)   |
| O12-DY2-O11 | 68.6(3)    |
| O10-DY2-O11 | 71.0(3)    |
| O9-DY2-O11  | 75.9(3)    |
| O7-DY2-O11  | 137.6(4)   |
| O1-DY2-O8   | 90.0(4)    |
| O12-DY2-O8  | 86.5(3)    |
| O10-DY2-O8  | 143.1(4)   |
| O9-DY2-O8   | 113.1(5)   |
| O7-DY2-O8   | 74.5(3)    |
| O11-DY2-O8  | 145.8(3)   |
| O1-DY2-O1M  | 157.4(4)   |
| O12-DY2-O1M | 77.9(2)    |
| O10-DY2-O1M | 130.7(4)   |
| O9-DY2-O1M  | 71.4(3)    |
| O7-DY2-O1M  | 120.0(5)   |
| O11-DY2-O1M | 75.5(3)    |
| O8-DY2-O1M  | 76.7(3)    |
| O1-DY2-Y1   | 41.45(14)  |
| O12-DY2-Y1  | 123.2(4)   |
| O10-DY2-Y1  | 43.19(13)  |
| O9-DY2-Y1   | 90.4(2)    |
| O7-DY2-Y1   | 41.39(14)  |
| O11-DY2-Y1  | 111.4(3)   |
| O8-DY2-Y1   | 101.7(3)   |

|             |           |
|-------------|-----------|
| O1M-DY2-Y1  | 158.8(4)  |
| O1-DY2-DY1  | 39.5(2)   |
| O12-DY2-DY1 | 120.9(3)  |
| O10-DY2-DY1 | 42.5(3)   |
| O9-DY2-DY1  | 92.0(3)   |
| O7-DY2-DY1  | 43.98(18) |
| O11-DY2-DY1 | 109.8(5)  |
| O8-DY2-DY1  | 102.9(4)  |
| O1M-DY2-DY1 | 161.2(3)  |
| DY2-O1-Y1   | 101.1(2)  |
| Y2-O1-Y1    | 98.52(9)  |
| DY2-O1-DY1  | 103.9(4)  |
| Y2-O1-DY1   | 101.1(3)  |
| DY1-O7-Y2   | 95.5(2)   |
| DY1-O7-DY2  | 95.7(3)   |
| Y2-O7-Y1    | 97.68(9)  |
| DY2-O7-Y1   | 98.1(3)   |
| DY2-O10-Y1  | 92.3(2)   |
| Y1-O10-Y2   | 97.88(10) |
| DY2-O10-DY1 | 93.6(3)   |
| Y2-O10-DY1  | 99.3(3)   |

**Table S8.** Parameters obtained by fitting the Cole-Cole plots (1500 dc field, Figure 3e) of 1:MeOH using the sum of two generalized Debye functions.

| <b>T</b> | <b><math>\Delta\chi_1</math></b> | <b><math>\Delta\chi_2</math></b> | <b><math>\alpha_1</math></b> | <b><math>\alpha_2</math></b> | <b><math>\tau_1</math></b> | <b><math>\tau_2</math></b> |
|----------|----------------------------------|----------------------------------|------------------------------|------------------------------|----------------------------|----------------------------|
| 1.8      | 3.33313                          | 6.609                            | 0.11239                      | 0.48806                      | 0.08699                    | 0.00183                    |
| 1.9      | 3.20179                          | 6.66823                          | 0.14812                      | 0.50379                      | 0.0789                     | 0.0018                     |
| 2        | 2.93556                          | 6.66126                          | 0.15095                      | 0.50456                      | 0.07479                    | 0.00185                    |
| 2.5      | 2.21439                          | 5.82446                          | 0.1884                       | 0.47805                      | 0.04587                    | 0.00164                    |
| 3        | 1.81643                          | 4.9345                           | 0.21725                      | 0.45188                      | 0.02688                    | 0.00132                    |
| 3.5      | 1.82428                          | 3.82966                          | 0.24748                      | 0.40776                      | 0.01508                    | 8.84003E-4                 |
| 4        | 1.76695                          | 3.04706                          | 0.24002                      | 0.37069                      | 0.00921                    | 6.02288E-4                 |
| 4.5      | 1.51216                          | 2.5898                           | 0.21808                      | 0.33713                      | 0.00665                    | 4.88965E-4                 |
| 5        | 1.35823                          | 2.18504                          | 0.21401                      | 0.31361                      | 0.00475                    | 3.90499E-4                 |
| 6        | 0.90384                          | 1.6648                           | 0.14422                      | 0.23779                      | 0.00333                    | 3.26681E-4                 |
| 7        | 0.61128                          | 1.28968                          | 0.10199                      | 0.19307                      | 0.00237                    | 2.78417E-4                 |
| 8        | 0.41084                          | 0.94096                          | 0.03841                      | 0.11414                      | 0.00187                    | 2.62749E-4                 |
| 9        | 0.28782                          | 0.68026                          | 0.02576                      | 0.06072                      | 0.00142                    | 2.48878E-4                 |
| 10       | 0.22378                          | 0.48196                          | 0.01827                      | 0                            | 0.00105                    | 2.25511E-4                 |



**Table S9.** Parameters obtained by fitting the out-of-phase (Figure 5b) versus T ac magnetic susceptibility signals for **Dy@Y2** in a 3.0 G ac field oscillating between 1488 and 10 Hz using the sum of two generalized Debye functions.

| <b>T</b> | <b><math>\alpha_1</math></b> | <b><math>\alpha_2</math></b> | <b><math>\tau_1</math></b> | <b><math>\tau_2</math> (fixed)<br/>taken from Tab. S7</b> |
|----------|------------------------------|------------------------------|----------------------------|-----------------------------------------------------------|
| 1.8      | 0.50666                      | 0.47611                      | 0.12037                    | 0.00183                                                   |
| 1.9      | 0.52619                      | 0.47155                      | 0.12157                    | 0.0018                                                    |
| 2        | 0.548                        | 0.48988                      | 0.1174                     | 0.00185                                                   |
| 2.5      | 0.56303                      | 0.49591                      | 0.0973                     | 0.00164                                                   |
| 3        | 0.53468                      | 0.46686                      | 0.07734                    | 0.00132                                                   |
| 3.5      | 0.54144                      | 0.47294                      | 0.04837                    | 8.84003E-4                                                |
| 4        | 0.52138                      | 0.37567                      | 0.02837                    | 6.02288E-4                                                |
| 4.5      | 0.51715                      | 0.3994                       | 0.02073                    | 4.88965E-4                                                |
| 5        | 0.49233                      | 0.41928                      | 0.01481                    | 3.90499E-4                                                |
| 6        | 0.46589                      | 0.40545                      | 0.00803                    | 3.26681E-4                                                |
| 7        | 0.41853                      | 0.35795                      | 0.0061                     | 2.78417E-4                                                |
| 8        | 0.38227                      | 0.30308                      | 0.0041                     | 2.62749E-4                                                |
| 9        | 0.40699                      | 0.26806                      | 0.0027                     | 2.48878E-4                                                |

**Table S10.** Ab Initio CASSCF/RASSI-SO calculations of the energy barrier of the lowest 8 KD of both Dy centers in 1·MeOH along with the deviation in the angle of the excited state anisotropic axis with respect to the ground state.

| KD | Dy-1(cm <sup>-1</sup> ) | Angle(°) | Dy-2(cm <sup>-1</sup> ) | Angle | Dy-1<br><i>g<sub>xx</sub>/g<sub>yy</sub>/g<sub>zz</sub></i> | Dy-2<br><i>g<sub>xx</sub>/g<sub>yy</sub>/g<sub>zz</sub></i> |
|----|-------------------------|----------|-------------------------|-------|-------------------------------------------------------------|-------------------------------------------------------------|
| 1  | 0                       | 0        | 0                       | 0     | 0.387/2.827/14.944                                          | 0.009/0.022/19.688                                          |
| 2  | 14.00                   | 87.4     | 120.47                  | 15.7  | 0.542/2.253/14.907                                          | 0.702/1.591/15.910                                          |
| 3  | 42.40                   | 27.2     | 168.88                  | 73.6  | 1.764/3.015/14.254                                          | 2.482/3.313/13.451                                          |
| 4  | 80.89                   | 40.6     | 227.75                  | 115.1 | 2.486/5.517/12.962                                          | 7.416/6.259/2.518                                           |
| 5  | 126.04                  | 86.4     | 286.85                  | 84.9  | 1.720/4.467/10.367                                          | 1.574/2.679/11.096                                          |
| 6  | 176.21                  | 114.1    | 316.75                  | 83.5  | 1.567/2.110/15.847                                          | 0.749/1.035/15.450                                          |
| 7  | 278.48                  | 89.2     | 377.73                  | 74.5  | 0.061/0.080/19.802                                          | 0.169/0.419/18.719                                          |
| 8  | 523.36                  | 131.6    | 695.87                  | 119.9 | 0.004/0.009/19.923                                          | 0.001/0.002/19.913                                          |

**Table S11.** *Ab initio* computed crystal field parameters for Dy-1 and Dy-2 centres of 1-MeOH

| Dy-1 |          |                 | Dy-2 |          |                  |
|------|----------|-----------------|------|----------|------------------|
| k    | q        | B(k,q)          | k    | q        | B(k,q)           |
| 2    | -2       | -5.23E+00       | 2    | -2       | 7.00E+00         |
|      | -1       | 8.99E+00        |      | -1       | -1.12E+01        |
|      | <b>0</b> | <b>2.85E+00</b> |      | <b>0</b> | <b>-3.28E+00</b> |
|      | 1        | -4.98E+00       |      | 1        | -8.78E+00        |
|      | 2        | -2.24E-01       |      | 2        | -1.94E+00        |
| 4    | -4       | -3.66E-02       | 4    | -4       | -5.15E-03        |
|      | -3       | 1.34E-02        |      | -3       | -4.31E-01        |
|      | -2       | -2.15E-02       |      | -2       | 1.34E-01         |
|      | -1       | 2.58E-01        |      | -1       | -5.97E-02        |
|      | <b>0</b> | <b>4.21E-02</b> |      | <b>0</b> | <b>-3.81E-02</b> |
|      | 1        | -7.04E-02       |      | 1        | -5.44E-02        |
|      | 2        | 8.44E-03        |      | 2        | -3.87E-03        |
|      | 3        | 1.48E-01        |      | 3        | 3.73E-01         |
|      | 4        | -3.50E-02       |      | 4        | -1.54E-02        |
| 6    | -6       | -1.96E-03       | 6    | -6       | -2.34E-03        |
|      | -5       | 5.33E-03        |      | -5       | 1.32E-02         |
|      | -4       | -1.06E-03       |      | -4       | -9.31E-04        |
|      | -3       | -3.80E-03       |      | -3       | -4.91E-03        |
|      | -2       | -4.22E-03       |      | -2       | -1.83E-03        |
|      | -1       | 6.65E-03        |      | -1       | 4.05E-03         |
|      | <b>0</b> | <b>2.33E-04</b> |      | <b>0</b> | <b>1.23E-04</b>  |
|      | 1        | -3.34E-04       |      | 1        | 3.90E-03         |
|      | 2        | -1.05E-03       |      | 2        | -3.54E-03        |
|      | 3        | 9.74E-04        |      | 3        | 4.98E-03         |
|      | 4        | 4.09E-03        |      | 4        | -3.79E-03        |
|      | 5        | -6.78E-03       |      | 5        | 6.70E-03         |
|      | 6        | -1.68E-03       |      | 6        | 4.10E-03         |

The following Hamiltonian is used for calculating the crystal field parameters.

$$H_{CF} = \sum_{k,q} B_k^q O_k^q$$

Where  $O_k^q =$  extended Stevens operator

k=rank of ITO=2,4,6

q=component of the ITO=-k,-k+1,.....,0,.....,k

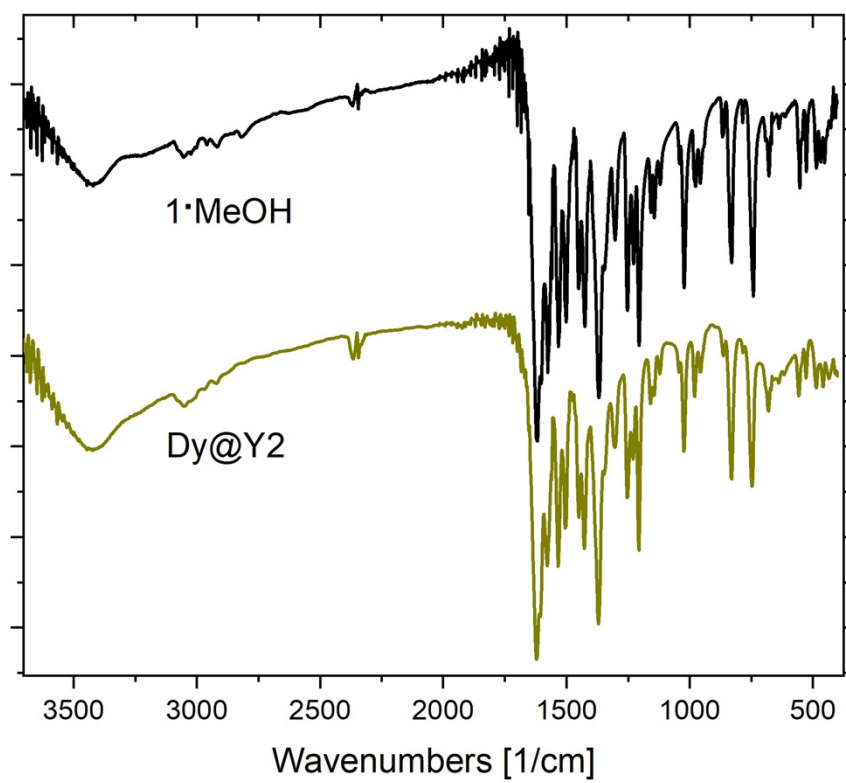

**Figure S 1.** The IR spectra (KBr, cm<sup>-1</sup>) of **1·MeOH** and **Dy@Y2**.

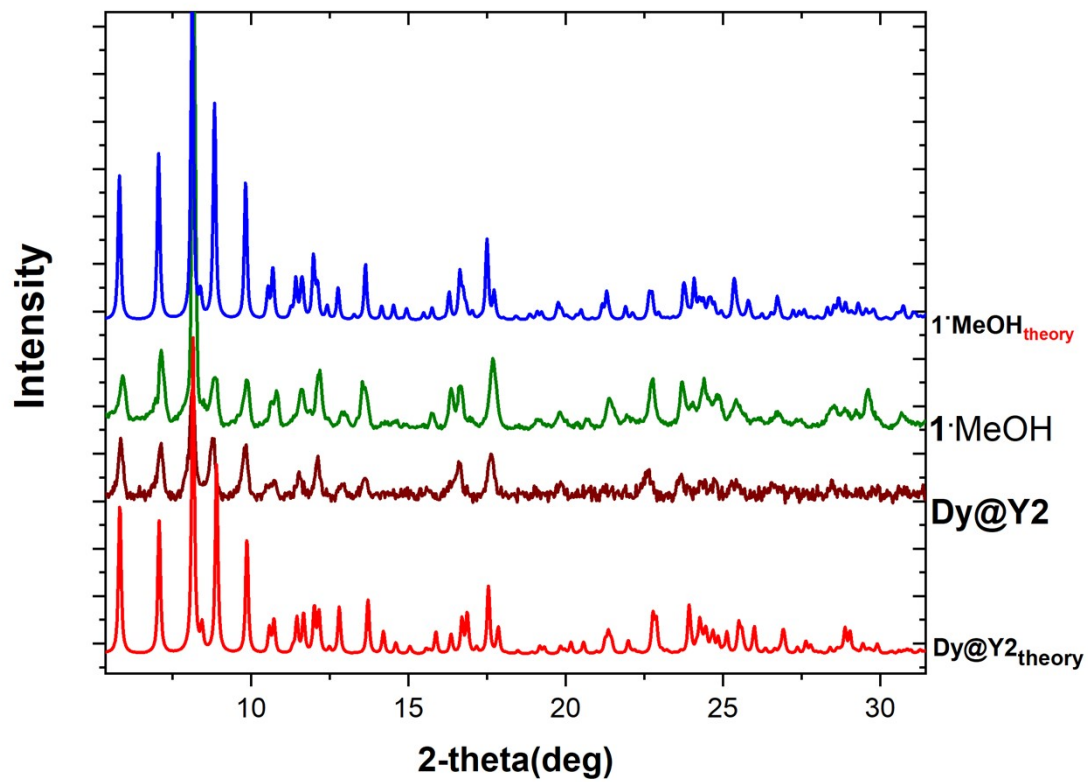

**Figure S 2.** Experimental and theoretical X-ray powder patterns of  $1:MeOH$  and  $Dy@Y2$ .

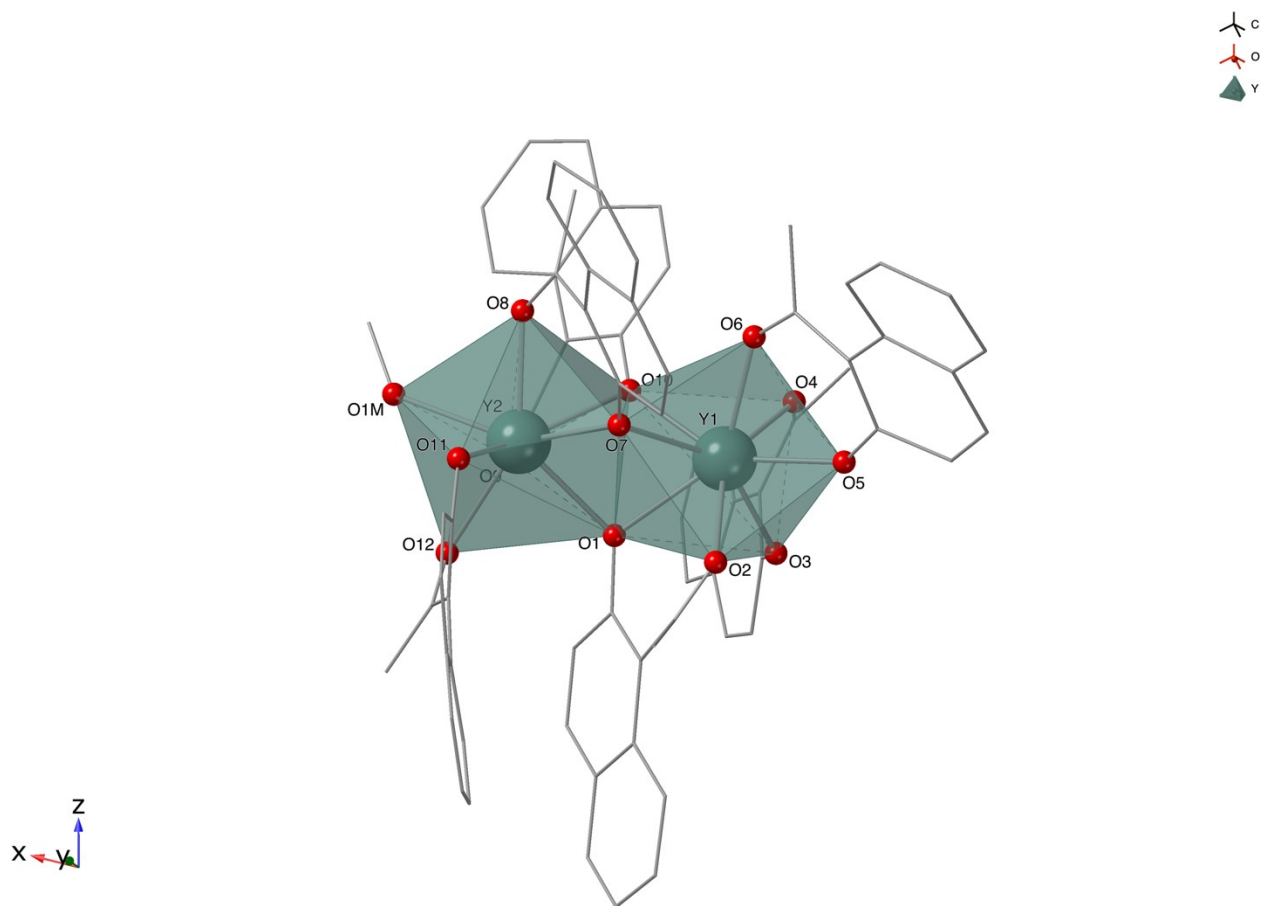

**Figure S 3.** Partially labelled plot of the crystal structure of **Dy@Y<sub>2</sub>**. The polyhedral representations of the Y<sup>III</sup> atoms are also shown. Hydrogen atoms and the dopant Dy<sup>III</sup> ions have been omitted for the sake of clarity.

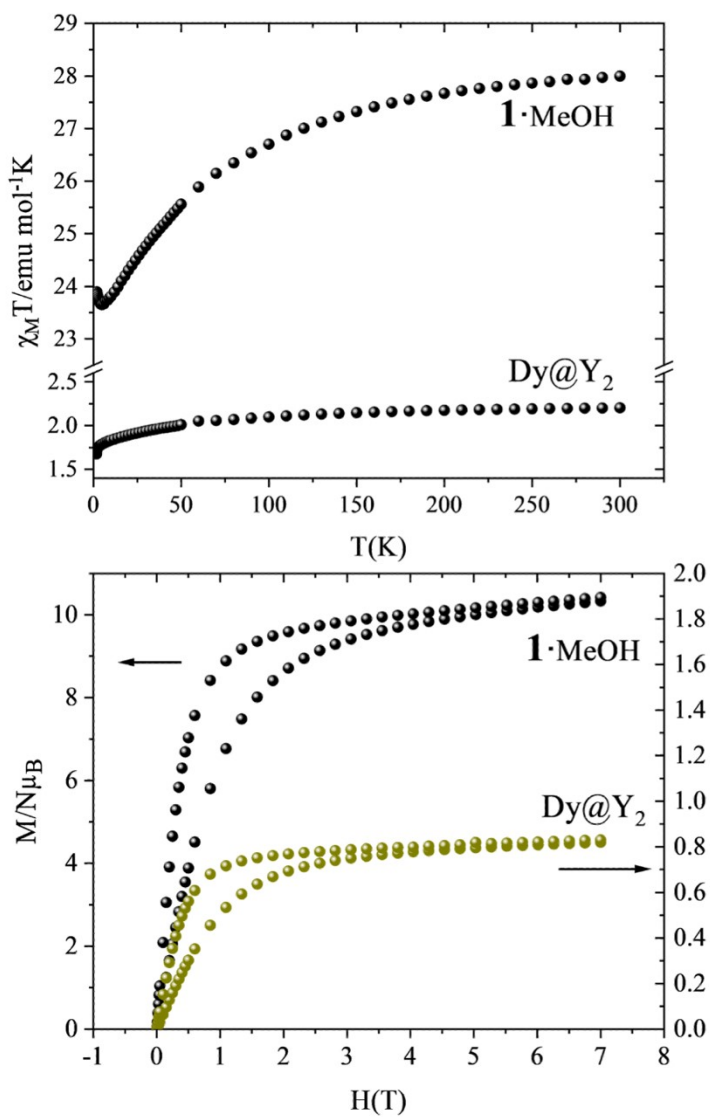

**Figure S 4.** (upper) Dc magnetic susceptibility of of  $1 \cdot \text{MeOH}$  and  $\text{Dy@Y}_2$  in the 300-2 K temperature range under an applied field of 0.1 T. (lower) Isothermal magnetization curves of  $1 \cdot \text{MeOH}$  and  $\text{Dy@Y}_2$  at 2K and 5K.

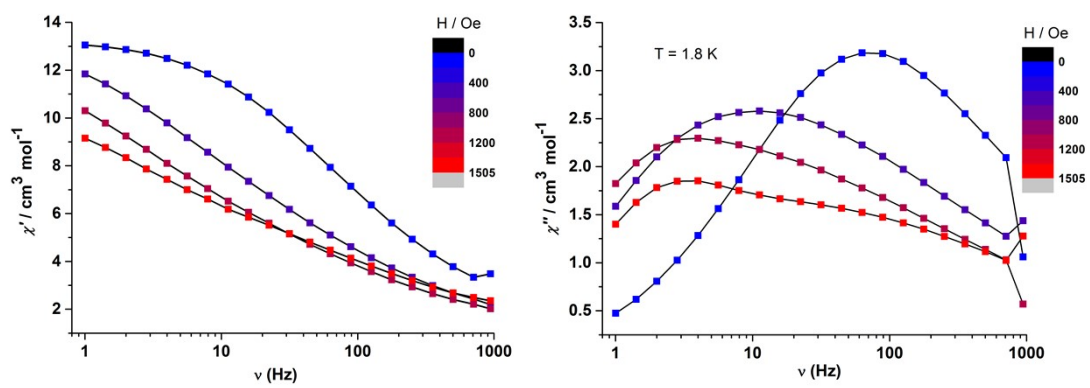

**Figure S 5.** Field dependence of the out-of-phase ac susceptibility signals for **1-MeOH**



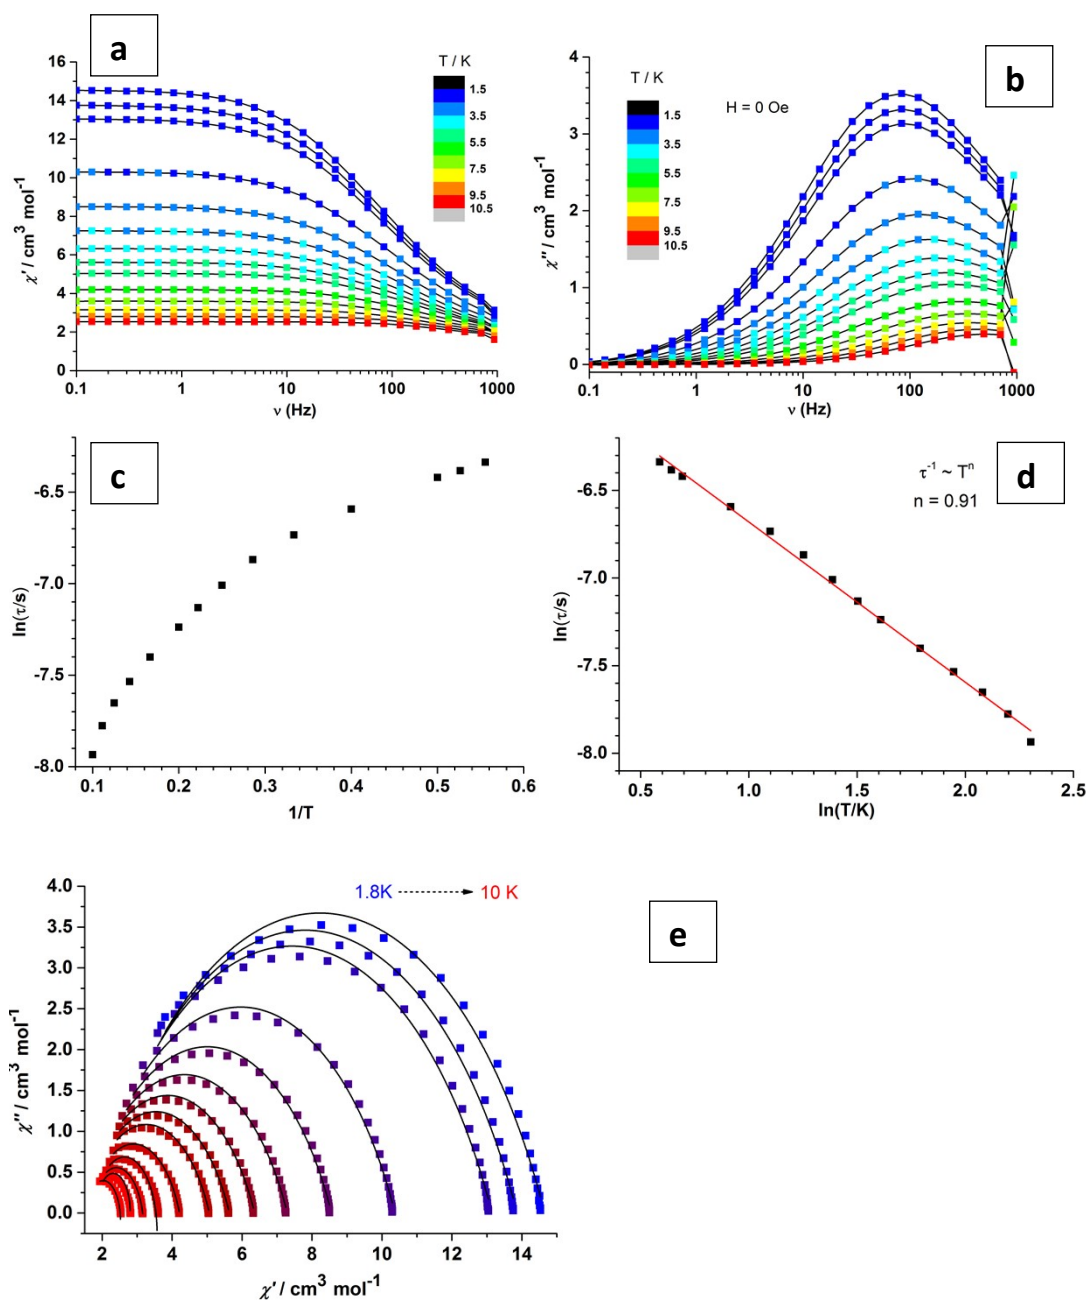

**Figure S 6.** (a)-(b) The weak temperature dependent  $\chi''$  signals were observed under zero dc field, indicating a small effective barrier. (c)-(d) No linear region is observed in Arrhenius fitting, while an exponential ( $T^n$ ) fitting gives  $n$  value close to 1, suggesting the direct relaxation process present here. (e) The fitting of Cole-Cole plots with a generalized Debye model gives  $\alpha$  values between 0.12 and 0.34. All curves are refer to 1:MeOH

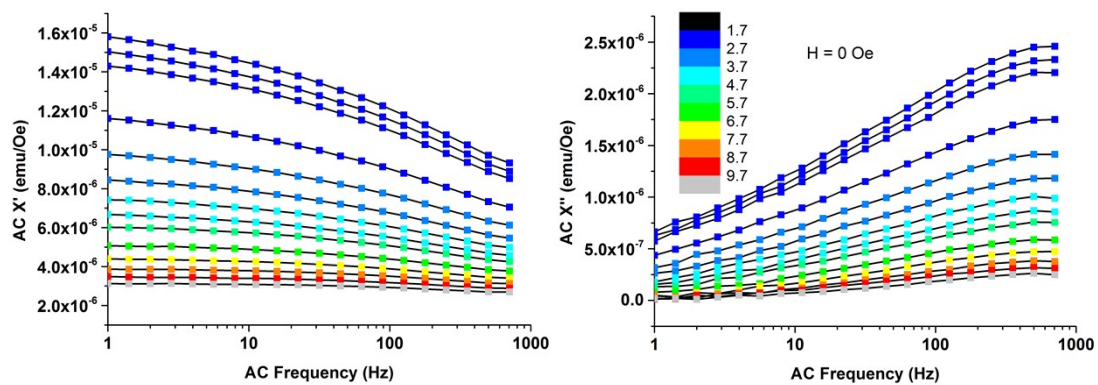

**Figure S 7.** Under zero field, no  $\chi_M''$  peaks were observed for the sample **Dy@Y2**

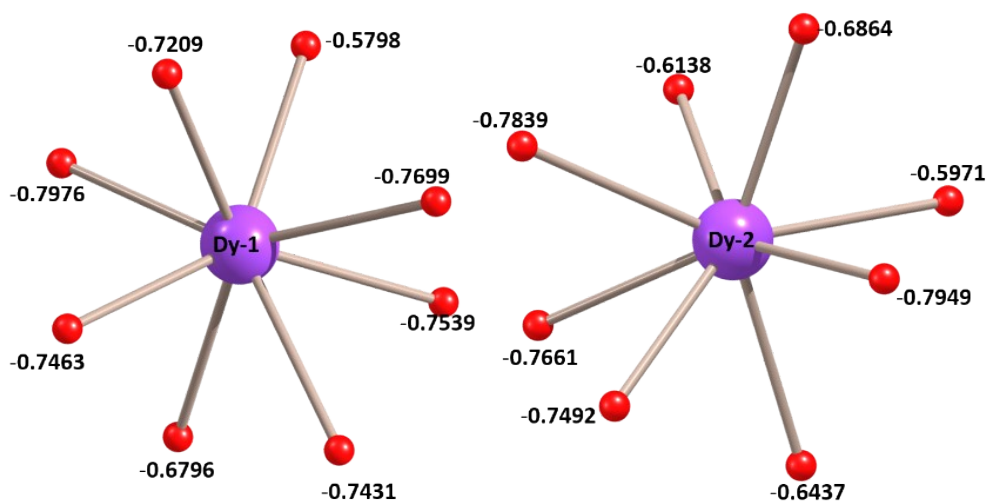

**Figure S 8.** LoProp charge on the surrounding O of both Dy-1 and Dy-2 centres of **1·MeOH**

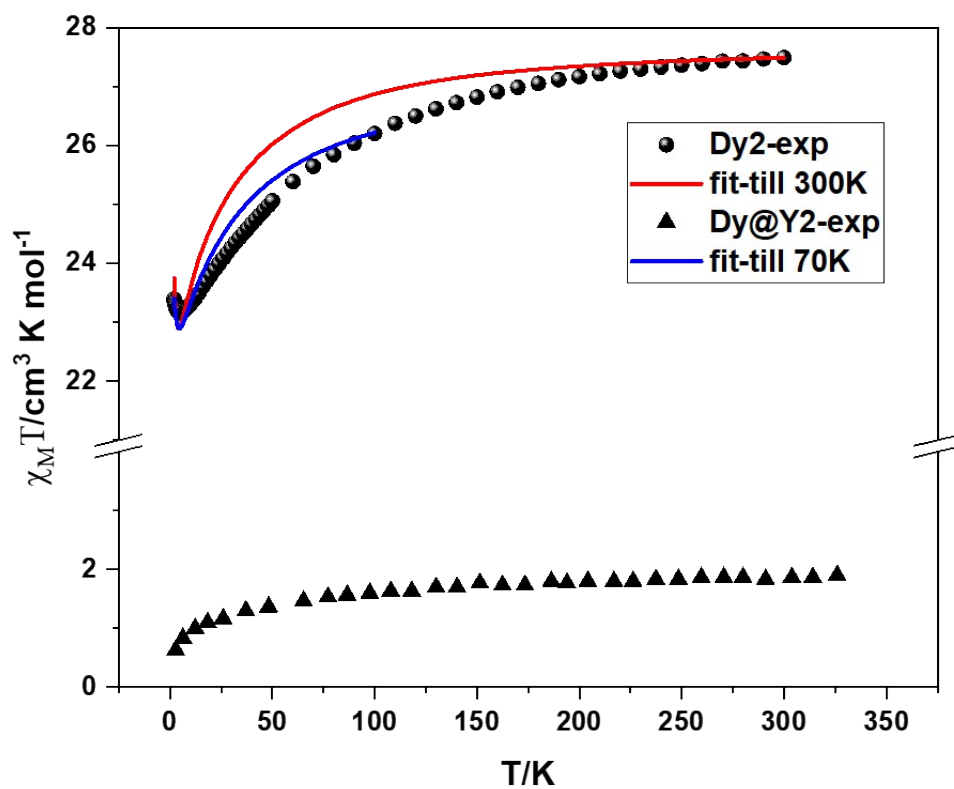

**Figure S 9.** Poly\_aniso fitted magnetic susceptibility for sample 1·MeOH (solid spheres). The magnetic susceptibility of **Dy@Y2** (solid triangles) is also presented for comparison reasons

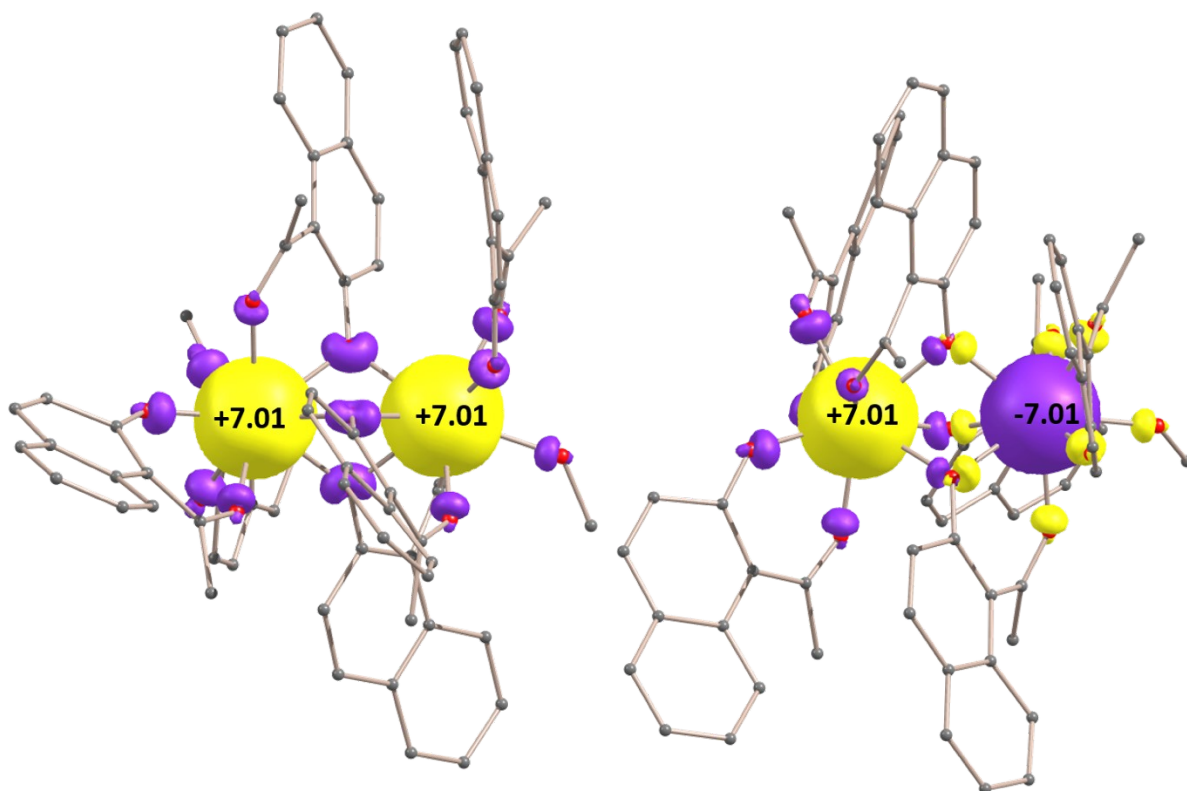

**Figure S 10.** Spin density plots for the high spin and broken symmetry states, obtained from the density function calculations using broken symmetry approach for **1**·MeOH

The exchange has been calculated using the following equation,

$$J_{exch} = \frac{E_{BS} - E_{HS}}{2S_1S_2 + S_2}$$

$E_{BS}$  = energy of broken symmetry state,  $E_{HS}$  = Energy of high spin state
